# Supplementary material for: Neoantigen vaccination induces clinical and immunologic responses in non-small cell lung cancer patients harboring EGFR mutations
Source: HighWire-hosted journal article supplement (doi:10.1136/jitc-2021-002531), 2021-07-01
Supplement: jitc-2021-002531supp005_data_supplement.xlsx [file jitc-2021-002531supp005_data_supplement.xlsx]

## Sheet: ST.5 
	Table S3. PPV patient responses by EGFR mutation.
	EGFR mutation	# patients	Patient #s	CR	PR	SD	PD	Group 1	Group 2	Group 3	PFS (months)	Mean PFS	# Deceased	Deceased pt #	# Alive	# Unknown
	WT	8	1, 2, 4, 6, 7, 9, 10, 19	0	0	4	4	8	0	0	4.9, 6.8, 2.0, 3.9, 20.3, 3.4, 2.7, 1.7	5.7	6	2, 4, 6, 9, 10, 19	1	1
	L858R	7	5, 8, 12, 14, 16, 18, 20	0	4	1	2	0	4	3	20.0, 9.5, 18.0, 7.6, 4.2, 1.9, 2.8	9.1	5	8, 14, 16, 18, 20	2	0
	Ex.19Del**	7	3, 13, 15, 17, 21, 23, 24	1	0	4	2	0	2	5	24.8, 8.9, 13.8, 14.9, 5.2, 2.9, 2.6	10.4	3	13, 15, 21	4	0
	H773L	2	11, 22	0	2	0	0	0	1	1	8.6, 8.7	8.7	1	11	1	0
	Del+T790M	2*	15, 17	1	0	1	0	0	1	1	13.8, 14.9	14.4	1	15	1	0
	Exon 19 deletions**	# patients	Patient #s	CR	PR	SD	PD	Group 1	Group 2	Group 3	PFS (months)	Mean PFS	# Deceased	Deceased pt #
	746_750del	4	3, 15*, 23, 24	0	0	2	2	0	1	3	24.8, 13.8, 2.9, 2.6	11.1	1	15
	745_750del	2	13, 21	0	0	2	0	0	0	2	8.9, 5.2	7.1	2	13, 21
	747_751Del	1	17*	1	0	0	0	0	1	0	14.9	14.9	0	NA
			* also T790M
