# Supplementary material for: Neoantigen vaccination induces clinical and immunologic responses in non-small cell lung cancer patients harboring EGFR mutations
Source: HighWire-hosted journal article supplement (doi:10.1136/jitc-2021-002531), 2021-07-01
Supplement: jitc-2021-002531supp007_data_supplement.xlsx [file jitc-2021-002531supp007_data_supplement.xlsx]

## Sheet: ST.3 
	Table S5. Anatomic locations of target and non-target lesions of immunized patients.
	Pt. ID	Site(s) of target lesions	Site(s) of non target lesions
	Pt.1	Lung	-
	Pt.2	-	Pleura, Pleural effusion
	Pt.3	Lung	Lymph nodes, Bone
	Pt.4	Lung, Mediastinum, Mediastinal lymph nodes	-
	Pt.5	Lung	Bone
	Pt.6	Lung, Cervical lymph nodes	Cervical lymph nodes
	Pt.7	Lung	-
	Pt.8	Lung, Hilar lymph nodes	Pleura, Mediastinal lymph nodes
	Pt.9	Lung, Mediastinal lymph nodes	Pleura
	Pt.10	Lung	Mediastinal lymph nodes
	Pt.11	Lung	Pleura
	Pt.12	Lung	Lung
	Pt.13	Lung	Lung
	Pt.14	Lung, Cervical lymph nodes	Right hilar and mediastinal lymph nodes
	Pt.15	Lung, Pleura	Pleura
	Pt.16	Lung, Mediastinal lymph nodes	Bone, Pleural effusion
	Pt.17	Lung, Pleura	Bone
	Pt.18	Lung, Mediastinum, Mediastinal lymph nodes	-
	Pt.19	Lung, Soft tissue of upper arm, Mediastinal lymph nodes	Pleura
	Pt.20	Lung, Mediastinal lymph nodes	Bone, Pleura
	Pt.21	Lung, Brain	Bone, Mediastinal lymph nodes
	Pt.22	Lung, Mediastinal lymph nodes	Pleura
	Pt.23	Lung, Liver	Bone
	Pt.24	Lung	Lung, Pleura
